# Supplementary material for: Novel bio-friendly and non-toxic thiocarbohydrate stabilizers of gold nanoparticles
Source: Royal Society of Chemistry journal article supplement (doi:10.1039/c5nj00293a), 2015-01-01
Supplement: c5nj00293a1.pdf [file c5nj00293a1.pdf]

## Supplementary information

### Novel Bio-friendly Thiocarbohydrate Stabilizers of Gold Nanoparticles

Christian. K. Adokoh, Collins Obuah, Orpah Zinyemba, Henok H. Kinfe\* and James Darkwa\*

*Department of Chemistry, University of Johannesburg, P. O. Box 524, Auckland Park, 2006,  
South Africa*

### Synthesis and Characterization of Compounds L1-L10

#### Di-(2-gluconamidoethyl) disulfide (L1)

D-(+)-Gluconic acid  $\delta$ -lactone (0.51 g, 2.80 mmol), 2-aminoethanethiol (0.56 g, 2.80 mmol) and triethylamine (20.10 mmol). Yield = 82%; melting point 150-151 °C;  $^1\text{H}$  NMR ( $\text{D}_2\text{O}$ , 400 MHz):  $\delta$  4.15 (d,  $J = 4.4$  Hz, 1H, H-3), 3.88 (s, 1H, H-2), 3.62 (d,  $J = 12.4$  Hz, 1H, H-4), 3.55 (s, 2H, H-6<sub>a</sub> and H-6<sub>b</sub>), 3.46 (t,  $J = 3.2$  Hz, 1H, H-5), 3.40-3.35 (m, 2H, -NCH<sub>2</sub>-), 2.74 (t, 2H,  $J = 6.0$  Hz, -CH<sub>2</sub>S-);  $^{13}\text{C}$  { $^1\text{H}$ } NMR ( $\text{D}_2\text{O}$ , 100 MHz):  $\delta$  175.4 (C-1), 74.4 (C-2), 73.2 (C-3), 72.1 (C-4), 71.3 (C-5), 63.7 (C-6), 38.8 (-NCH<sub>2</sub>-), 37.6 (-CH<sub>2</sub>S-). IR (neat,  $\text{cm}^{-1}$ ): 1649 (C=O, amide carbonyl str.), 1099 (C-N), 1209 (O-C, 2-bands), 3220 (O-H broad), 1438 (CH<sub>2</sub>); Raman ( $\text{cm}^{-1}$ ): 2935 (CH<sub>2</sub>), 1015 (C-C), 510 (S-S). Anal. Calcd for  $\text{C}_{16}\text{H}_{32}\text{O}_{12}\text{N}_2\text{S}_2$ : C, 37.79; H, 6.34; N, 5.51; S, 12.61%. Found: C, 37.58; H, 7.031; N, 5.33; S, 11.66%. HRMS (ESI):  $m/z$  [M+H]<sup>+</sup> Calcd 509.1390; found: 509.1010.

#### Di(3-gluconamidopropyl) disulfide (L2)

D-(+)-gluconic acid  $\delta$ -lactone (1.75 g, 9.80 mmol) and 3-aminopropane-1-thiol (0.93 g, 9.80 mmol). Yield = 92%; melting point = 155-156 °C.  $^1\text{H}$  NMR ( $\text{D}_2\text{O}$ , 400 MHz):  $\delta$  4.12 (d,  $J = 3.6$

Hz, 1H, H-3), 3.901 (t,  $J = 2.8$  Hz, 1H, H-2), 3.650 (s, 1H, H-4), 3.62 (bd,  $J = 2.0$  Hz, 1H, H-6a), 3.57 (bd,  $J = 6.0$  Hz, 2H, H-6b), 3.47 (dd,  $J = 5.6$  and  $11.6$  Hz, 1H, H-5), 3.19 (t,  $J = 6.8$  Hz, 2H, -NCH<sub>2</sub>-), 2.59 (t, 2H,  $J = 7.2$  Hz, -CH<sub>2</sub>S-), 1.76 (q,  $J = 7.2$  Hz, 2H, -CH<sub>2</sub>-). <sup>13</sup>C{<sup>1</sup>H} NMR (D<sub>2</sub>O, 100 MHz)  $\delta$  174.3 (C-1), 73.4 (C-2) 721.2 (C-3), 71.02 (C-4), 70.3 (C-5) 62.6 (C-6), 37.6 (-NCH<sub>2</sub>-), 35.0 (-CH<sub>2</sub>S-), 27.9 (-CH<sub>2</sub>-). FT-IR (neat, cm<sup>-1</sup>): 1624 (C=O), 2934 (C-H), 1027-1136 (C-O, C-C and C-S), 1257 (C-N) 3294 (O-H broad), 3201 (N-H) 1445 (CH<sub>2</sub> str.). Raman (cm<sup>-1</sup>): 2936 (CH<sub>2</sub>), 1108 (C-C), 511 (S-S). Anal. Calcd for C<sub>18</sub>H<sub>36</sub>O<sub>12</sub>N<sub>2</sub>S<sub>2</sub>: C, 40.29; H, 6.76; N, 5.22; S, 11.95%. Found: C, 40.35; H, 7.29; N, 5.19; S, 10.83%. HRMS (ESI):  $m/z$  [M+H]<sup>+</sup> Calcd 537.1788; found: 537.1791.

### **Di(4-gluconamidobutyl) disulfide (L3)**

D-(+)-gluconic acid  $\delta$ -lactone (1.50 g, 8.42 mmol), 4-aminobutane-1-thiol (0.89 g, 8.42 mmol). Yield = 47%; melting point = 159-160 °C. <sup>1</sup>H NMR (D<sub>2</sub>O, 400 MHz):  $\delta$  4.17 (d,  $J = 3.6$  Hz, 1H, H-2), 3.94 (t, 1H,  $J = 2.8$  Hz, H-3), 3.67 (t, 1H,  $J = 2.8$  Hz, H-4), 3.60 (q,  $J = 2.8$  Hz, 2H, H-5), 3.52 (q,  $J = 5.6$  Hz, 2H, H-6), 3.15 (t,  $J = 6.8$  Hz, 2H, -NCH<sub>2</sub>-), 2.64 (t,  $J = 7.2$  Hz, 2H, -CH<sub>2</sub>S-), 1.76 (m, 4H, (-CH<sub>2</sub>CH<sub>2</sub>-)). <sup>13</sup>C{<sup>1</sup>H} NMR (D<sub>2</sub>O, 100 MHz):  $\delta$  174.3 (C-1), 73.4 (C-2), 721.2 (C-3), 71.0 (C-4), 70.3 (C-5), 62.6 (C-6), 37.6 (-NCH<sub>2</sub>-), 35.0 (-CH<sub>2</sub>S-), 27.9 (-CH<sub>2</sub>CH<sub>2</sub>-). FT-IR (neat, cm<sup>-1</sup>) 3293 (O-H broad), 3201 (N-H), 2928 (C-H), 1623 (C=O amide carbonyl str.), 1544 (N-H), 1440 (CH<sub>2</sub> str.), 1257 (C-N), 1136 (C-S), 1083 (C-O). Raman (cm<sup>-1</sup>): 2955 (CH<sub>2</sub>), 1115 (C-C) 509 (S-S). Anal. Calcd for C<sub>20</sub>H<sub>40</sub>O<sub>12</sub>N<sub>2</sub>S<sub>2</sub>: C, 42.54; H 7.14; N, 4.96; S, 11.36%. Found: C, 42.24; H, 7.73; N, 4.83; S, 10.26%. HRMS (ESI): ( $m/z$ ) [M+H]<sup>+</sup> Calcd 565.2101; Found: 565.2101.

### Acetylated di(2-gluconamidoethyl)disulfide (L5)

Compound **L1** (0.10 g, 0.20 mmol) and acetic anhydride (0.74 mL). Yield = 83%.  $^1\text{H}$  NMR ( $\text{CDCl}_3$ , 400 MHz):  $\delta$  6.68 (t,  $J = 5.7$  Hz, 1H, N-H), 5.59 (t,  $J = 5.4$  Hz, 1H, H-3), 5.39 (t,  $J = 6.0$  Hz, 1H, H-4), 5.23 (t,  $J = 4.8$  Hz, 1H, H-2), 4.98 (q,  $J = 5.6$  Hz, 1H, H-5), 4.3 (dd,  $J = 4.00$  and 12.3 Hz, 1H, H-6a), 4.10 (dd,  $J = 5.70$  and 12.3 Hz, 1H, H-6b), 3.56 (q,  $J = 6.8$  Hz, 2H, -NCH<sub>2</sub>-), 2.76 (t, 2H,  $^3J = 6.3$  Hz, -CH<sub>2</sub>S-), 2.19 (s, -OCOCH<sub>3</sub>), 2.09 (s, -OCOCH<sub>3</sub>), 2.07 (s, -OCOCH<sub>3</sub>), 2.05 (s, -OCOCH<sub>3</sub>), 2.03 (s, -OCOCH<sub>3</sub>).  $^{13}\text{C}\{^1\text{H}\}$  NMR ( $\text{CDCl}_3$ , 100 MHz):  $\delta$  170.7 (-OCOCH<sub>3</sub>), 169.9 (-OCOCH<sub>3</sub>), 169.8 (-OCOCH<sub>3</sub>), 169.3 (-OCOCH<sub>3</sub>), 166.5 (C-1), 71.8 (C-2), 69.5 (C-3), 68.7 (C-4), 69.0 (C-5), 61.6 (C-6), 38.1 (-NCH<sub>2</sub>-), 37.3 (-CH<sub>2</sub>S-), 20.6 (-OCOCH<sub>3</sub>), 20.7 (-OCOCH<sub>3</sub>), 20.7 (-OCOCH<sub>3</sub>), 20.7 (-OCOCH<sub>3</sub>), 20.5, (-OCOCH<sub>3</sub>). FT-IR (neat,  $\text{cm}^{-1}$ ): 1744 (C=O, ester carbonyl str.), 1677 (C=O, amide carbonyl str.), 1528 (N-H); 1207 (C-N) 1038 (O-C). Anal. Calcd for  $\text{C}_{36}\text{H}_{52}\text{O}_{22}\text{N}_2\text{S}_2$ : C, 46.55; H, 5.64; N, 3.02; S, 6.90%. Found: C, 46.04; H, 5.28; N, 2.86; S, 5.93%. HRMS (ESI):  $m/z$   $[\text{M}+\text{H}]^+$  Calcd 929.2531; found: 929.2538.

### Acetylated di(3-gluconamidopropyl) disulfide (L6)

Compound **L2** (0.40 g, 0.74 mmol) and acetic anhydride (0.71 mL). Yield = 84%;  $^1\text{H}$  NMR ( $\text{CDCl}_3$ , 400 MHz):  $\delta$  6.35 (t,  $J = 6$  Hz, 1H, N-H), 5.65 (t,  $J = 5.2$  Hz, 1H, H-3), 5.41 (q,  $J = 4.8$  Hz, 1H, H-4), 5.25 (d,  $J = 5.2$  Hz, 1H, H-2), 5.02 (quintet,  $J = 4.0$  Hz, 1H, H-5), 4.28 (dd,  $J = 4.0$  and 12.4 Hz, 1H, H-6a), 4.10 (dd,  $J = 5.6$  and 12.4 Hz, 1H, H-6b), 3.34 (q,  $J = 6.8$  Hz, 2H, -NCH<sub>2</sub>-), 2.64 (q,  $J = 7.2$  Hz, 2H, -CH<sub>2</sub>S-), 1.87 (t,  $J = 7.2$  Hz, 2H, -CCH<sub>2</sub>C-), 2.02 (s, 3H, -OCOCH<sub>3</sub>), 2.04 (s, 3H, -OCOCH<sub>3</sub>), 2.06 (s, 3H, -OCOCH<sub>3</sub>), 2.07 (s, 3H, -OCOCH<sub>3</sub>), 2.08 (s, 3H, -OCOCH<sub>3</sub>), 2.17 (s, 3H, -OCOCH<sub>3</sub>).  $^{13}\text{C}\{^1\text{H}\}$  NMR ( $\text{CDCl}_3$ , 100 MHz):  $\delta$  170.7 (-

OCOCH<sub>3</sub>), 169.9 (-OCOCH<sub>3</sub>), 169.8 (-OCOCH<sub>3</sub>), 169.3 (-OCOCH<sub>3</sub>), 166.3 (C-1), 71.7 (C-2), 69.4 (C-3), 69.0 (C-4), 68.8 (C-5), 61.6 (C-6), 53.4(-NHCH<sub>2</sub>-), 38.2(-CH<sub>2</sub>CH<sub>2</sub>CH<sub>2</sub>-), 35.8 (-CH<sub>2</sub>S-), 28.7, 20.8 (2×-OCOCH<sub>3</sub>), 20.7 (2×-OCOCH<sub>3</sub>), 20.5 (-OCOCH<sub>3</sub>). FT-IR (neat, cm<sup>-1</sup>): 2941 (C-H str.), 1743 ν(C=O), 1673 (C=O, amide carbonyl str.), 1535 (N-H), 1370 (CH<sub>2</sub> bend), 1205 (C-N), 1033 (O-C). Anal. Calcd for C<sub>38</sub>H<sub>56</sub>O<sub>22</sub>N<sub>2</sub>S<sub>2</sub>: C, 47.69; H, 5.90; N, 2.93; S, 6.70%. Found: C, 47.39; H, 6.46; N, 2.80; S, 5.60%. HRMS (ESI): (m/z) [M+H]<sup>+</sup> Calcd 957.2844; found: 957.2842.

#### Acetylated di(4-gluconamidobutyl) disulfide (L7)

Compound **L3** (0.40 g, 0.71 mmol) and acetic anhydride (0.68 mL). Yield = 84%. <sup>1</sup>H NMR (CDCl<sub>3</sub>, 400 MHz): δ 6.17 (t, *J* = 6.0 Hz, 1H, N-H), 5.64 (t, *J* = 5.2 Hz, 1H, H-2), 5.42 (q, *J* = 5.2 Hz, 1H, H-3), 5.26 (t, *J* = 4.8 Hz, 1H, H-4), 5.01 (m, 1H, H-5), 4.29 (dd, *J* = 4.0 and 12.4 Hz, 1H, H-6a), 4.11 (dd, *J* = 5.6 and 12.4 Hz, 1H, H-6b), 3.25 (q, 2H, <sup>3</sup>*J* = 5.6 Hz, -CH<sub>2</sub>S-), 2.64 (q, 2H, *J* = 7.2 Hz, -NCH<sub>2</sub>-), 1.62 (m, 4H, -CH<sub>2</sub>CH<sub>2</sub>-), 2.18 (s, 3H, -OCOCH<sub>3</sub>), 2.08 (s, 3H, -OCOCH<sub>3</sub>), 2.06 (s, 3H, -OCOCH<sub>3</sub>), 2.03 (s, 3H, -OCOCH<sub>3</sub>), 2.02 (s, 3H, -OCOCH<sub>3</sub>). <sup>13</sup>C {<sup>1</sup>H} NMR (CDCl<sub>3</sub>, 100 MHz): δ 170.6 (-OCOCH<sub>3</sub>), 169.8 (-OCOCH<sub>3</sub>), 169.8 (-OCOCH<sub>3</sub>), 169.7 (-OCOCH<sub>3</sub>), 169.2 (-OCOCH<sub>3</sub>), 166.1 (C-1), 71.6 (C-2), 69.3 (C-3), 69.0 (C-4), 68.7 (C-5), 61.5 (C-6), 38.7, 30.6, 28.3, 26.8, 20.7 (-OCOCH<sub>3</sub>), 20.7 (-OCOCH<sub>3</sub>), 20.4 (-OCOCH<sub>3</sub>), 20.4 (-OCOCH<sub>3</sub>), FT-IR (neat, cm<sup>-1</sup>): 2941(C-H str.), 1744 (C=O), 1685 ν(C=O, amide carbonyl str.), 1535 (N-H), 1370 (CH<sub>2</sub> bend), 1204 (C-N), 1033 (O-C). Anal. Calcd for C<sub>40</sub>H<sub>60</sub>O<sub>22</sub>N<sub>2</sub>S<sub>2</sub>: C, 48.77; H, 6.14; N, 2.84; S, 6.51%. Found: C, 48.63; H, 6.81; N, 2.73; S, 5.56%. HRMS (ESI): m/z [M+H]<sup>+</sup> Calcd 986.0350; found: 986.0179.

### Acetylated 2-gluconamidoethyl thiol (L8)

Compound **L5** (0.45 g, 0.48 mmol), Zn (1.0 g, 15.30 mmol), 5% acetic acid (10 mL). Yield = 91%.  $^1\text{H}$  NMR ( $\text{CDCl}_3$ , 400, MHz):  $\delta$  6.64 (d,  $J = 5.2$  Hz, 1H, N-H), 5.64 (t,  $J = 4.4$  Hz, 1H, H-4), 5.43 (t,  $J = 6.4$  Hz, 1H, H-3), 5.27 (d,  $J = 4.8$  Hz, 1H, H-2), 5.03 (q,  $J = 5.2$  Hz, 1H, H-5), 4.30 (dd,  $J = 3.6$  and 12.4 Hz, 1H, H-6a), 4.10 (dd,  $J = 5.6$  and 12.4 Hz, 1H, H-6b), 3.55 (m,  $J = 6.4$  Hz, 2H,  $-\text{NCH}_2-$ ), 2.76 (t,  $J = 6$  Hz, 2H,  $-\text{CH}_2\text{SH}$ ), 2.02 (s, 3H,  $-\text{OCOCH}_3$ ), 2.04 (s, 3H,  $-\text{OCOCH}_3$ ), 2.06 (s, 3H,  $-\text{OCOCH}_3$ ), 2.09 (s, 3H,  $-\text{OCOCH}_3$ ), 2.18 (s, 3H,  $-\text{OCOCH}_3$ ).  $^{13}\text{C}\{^1\text{H}\}$  NMR ( $\text{CDCl}_3$ , 100 MHz)  $\delta$  170.8 ( $-\text{OCOCH}_3$ ), 169.9 ( $-\text{OCOCH}_3$ ), 169.9 ( $-\text{OCOCH}_3$ ), 169.8 ( $-\text{OCOCH}_3$ ), 165.4 ( $-\text{OCOCH}_3$ ), 169.4 (C-1), 71.8 (C-2), 69.5 (C-3), 69.2 (C-4), 68.9 (C-5), 61.6 (C-6), 37.5 ( $-\text{NCH}_2$ ), 38.3 ( $-\text{CH}_2\text{SH}$ ), 20.5 ( $-\text{OCOCH}_3$ ), 20.7 ( $-\text{OCOCH}_3$ ), 20.7 ( $-\text{OCOCH}_3$ ), 20.8 ( $-\text{OCOCH}_3$ ). FT-IR (neat,  $\text{cm}^{-1}$ ): 1744  $\nu(\text{C}=\text{O})$ , 1673 (C=O, amide carbonyl str.), 1531 (N-H), 2954 (C-H str.) 1433 ( $\text{CH}_2$ ), 1206 (O-C), 1045 (C-N). Anal. Calcd for  $\text{C}_{18}\text{H}_{27}\text{O}_{11}\text{NS}$ : C, 46.40; H, 5.85; N, 3.01; S, 6.89%. Found: C, 45.53; H, 4.99; N, 2.86; S, 6.32%. HRMS (ESI):  $m/z$   $[\text{M}+\text{H}]^+$  Calcd 466.1383; found: 466.1390.

### Acetylated 3-gluconamidopropyl thiol (L9)

Compound **L6** (0.50 g, 0.52 mmol), 5% acetic acid (10 mL) and zinc (1.00 g, 15.30 mg). Yield = 96%.  $^1\text{H}$  NMR ( $\text{CDCl}_3$ , 400 MHz):  $\delta$  6.34 (t,  $J = 6.0$  Hz, 1H, N-H), 5.67 (t,  $J = 5.2$  Hz, 1H, H-2), 5.43 (t,  $J = 5.6$  Hz, 1H, H-3), 5.27 (q,  $J = 7.6$  Hz, 1H, H-4), 5.01 (q,  $J = 5.2$  Hz, 1H, H-5), 4.29 (dd,  $J = 4.2$ , and 12.4 Hz, 1H, H-6a), 4.11 (dd,  $J = 5.4$  and 12.2 Hz, 1H, H-6b), 3.37 (m,  $J = 6.8$  Hz, 2H,  $-\text{NCH}_2-$ ), 2.66 (t,  $J = 7.2$  Hz, 1H,  $-\text{CH}_2\text{S}-$ ), 2.53 (t, 1H,  $J = 7.2$  Hz,  $-\text{CH}_2\text{S}-$ ), 2.18 (s, 3H,  $-\text{OCOCH}_3$ ), 2.09 (s, 3H,  $-\text{OCOCH}_3$ ), 2.07 (s, 3H,  $-\text{OCOCH}_3$ ), 2.04 (s, 3H,  $-\text{OCOCH}_3$ ), 2.03

(s, 3H, -OCOCH<sub>3</sub>), 1.87 (t, 1H,  $J = 7.2$  Hz, -CH<sub>a</sub>-), 1.80 (tt,  $J = 2.4$  and  $6.8$  Hz, 1H, -CH<sub>b</sub>-), 1.44 (t,  $J = 8.0$  Hz, 1H, SH). <sup>13</sup>C{<sup>1</sup>H} NMR (CDCl<sub>3</sub>, 100 MHz): δ 170.7 (-OCOCH<sub>3</sub>), 169.9 (-OCOCH<sub>3</sub>), 169.8 (-OCOCH<sub>3</sub>), 169.8 (-OCOCH<sub>3</sub>), 169.3 (-OCOCH<sub>3</sub>), 166.3 (C-1), 71.7 (C-2), 69.4 (C-3), 69.0 (C-4), 68.8 (C-5), 61.6 (C-6), 38.2 (-NCH<sub>2</sub>-), 35.8 (-CH<sub>2</sub>S-), 28.7 (-CH<sub>2</sub>-), 20.8 (-OCOCH<sub>3</sub>), 20.7 (-OCOCH<sub>3</sub>), 20.7 (-OCOCH<sub>3</sub>), 20.5 (-OCOCH<sub>3</sub>). FT-IR (neat, cm<sup>-1</sup>): 1743 (C=O), 1672 (C=O, amide carbonyl str.), 1535 (N-H) 2936 (C-H str.), 1434 (CH<sub>2</sub> bend), 1204 (O-C), 1033 (C-N). Anal. Calcd for C<sub>19</sub>H<sub>28</sub>O<sub>11</sub>NS.0.5CH<sub>2</sub>Cl<sub>2</sub>: C, 45.50; H, 5.73; N, 2.65; S, 6.07%. Found: C, 45.83; H, 6.36; N, 2.77; S, 4.06%. HRMS (ESI):  $m/z$  [M+H]<sup>+</sup> Calcd 480.1540; found: 480.1513.

#### Acetylated 4-gluconamidobutyl thiol (L10)

Compound **L7** (0.40 g, 0.041 mmol), 5% acetic acid (7.0 mL) and Zn (0.64 g, 9.79 mmol). Yield = 90%. <sup>1</sup>H NMR (CDCl<sub>3</sub>, 400 MHz): δ 6.10 (t,  $J = 5.2$  Hz, 1H, N-H), 5.65 (t,  $J = 5.2$  Hz, 1H, H-4), 5.41 (t,  $J = 5.6$  Hz, 1H, H-3), 5.25 (t,  $J = 4.0$  Hz, 1H, H-2), 5.02 (m, H-5), 4.29 (dd,  $J = 4.0$  and  $12.4$  Hz, 1H, H-6a), 4.10 (dd,  $J = 5.4$  and  $12.2$  Hz, 1H, H<sub>b</sub>), 3.24 (t,  $J = 4.0$  Hz, 2H, -NCH<sub>2</sub>-), 2.64 (t,  $J = 6.8$  Hz, 1H, -CH<sub>a</sub>S-), 2.53 (t,  $J = 7.2$  Hz, 1H, -CH<sub>b</sub>S-), 2.18 (s, 3H, -OCOCH<sub>3</sub>), 2.09 (s, 3H, -OCOCH<sub>3</sub>), 2.07 (s, 3H, -OCOCH<sub>3</sub>), 2.04 (s, 3H, -OCOCH<sub>3</sub>), 2.03 (s, 3H, -OCOCH<sub>3</sub>), 1.57 (m, 4H, -CH<sub>2</sub>CH<sub>2</sub>-), 1.33 (t,  $J = 7.6$  Hz, 1H, S-H). <sup>13</sup>C{<sup>1</sup>H} NMR (100 MHz, CDCl<sub>3</sub>): δ 170.6 (-OCOCH<sub>3</sub>), 169.9 (-OCOCH<sub>3</sub>), 169.9 (-OCOCH<sub>3</sub>), 169.7 (-OCOCH<sub>3</sub>), 169.2 (-OCOCH<sub>3</sub>), 166.1 (C-1), 71.6 (C-2), 69.4 (C-3), 69.1 (C-4), 68.8 (C-5), 61.6 (C-6), 38.9 (-NCH<sub>2</sub>-), 30.9 (-CH<sub>2</sub>S-), 28.0 (-CH<sub>2</sub>-), 24.1 (-CH<sub>2</sub>-), 20.7 (2×(-OCOCH<sub>3</sub>)), 20.7 (2×(-OCOCH<sub>3</sub>)), 20.4 (-OCOCH<sub>3</sub>). FT-IR (neat, cm<sup>-1</sup>): 1743 (C=O), 1665 (C=O, amide carbonyl str.), 1531 (N-

H), 1434 (CH<sub>2</sub> bend), 1370 (C-H) 1202 (O-C), 1033 (C-N). Anal. Calcd for C<sub>20</sub>H<sub>31</sub>O<sub>11</sub>NS: C, 48.67, H, 6.33, N, 2.84, S, 6.50%. Found: C, 48.35; H, 7.05; N, 2.71; S, 5.44. HRMS (ESI): *m/z* [M+H]<sup>+</sup> Calcd 494.1696; found: 494.1703.

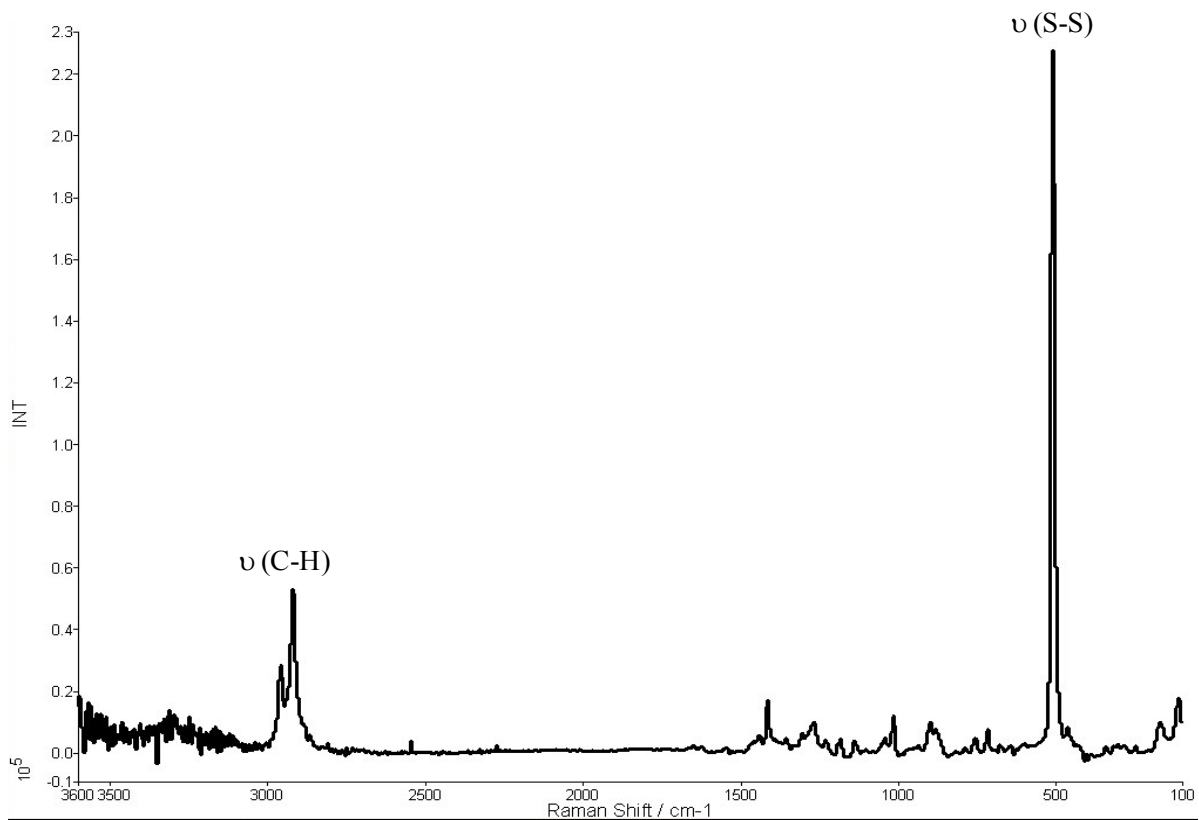

Figure S1. Raman spectrum of L1

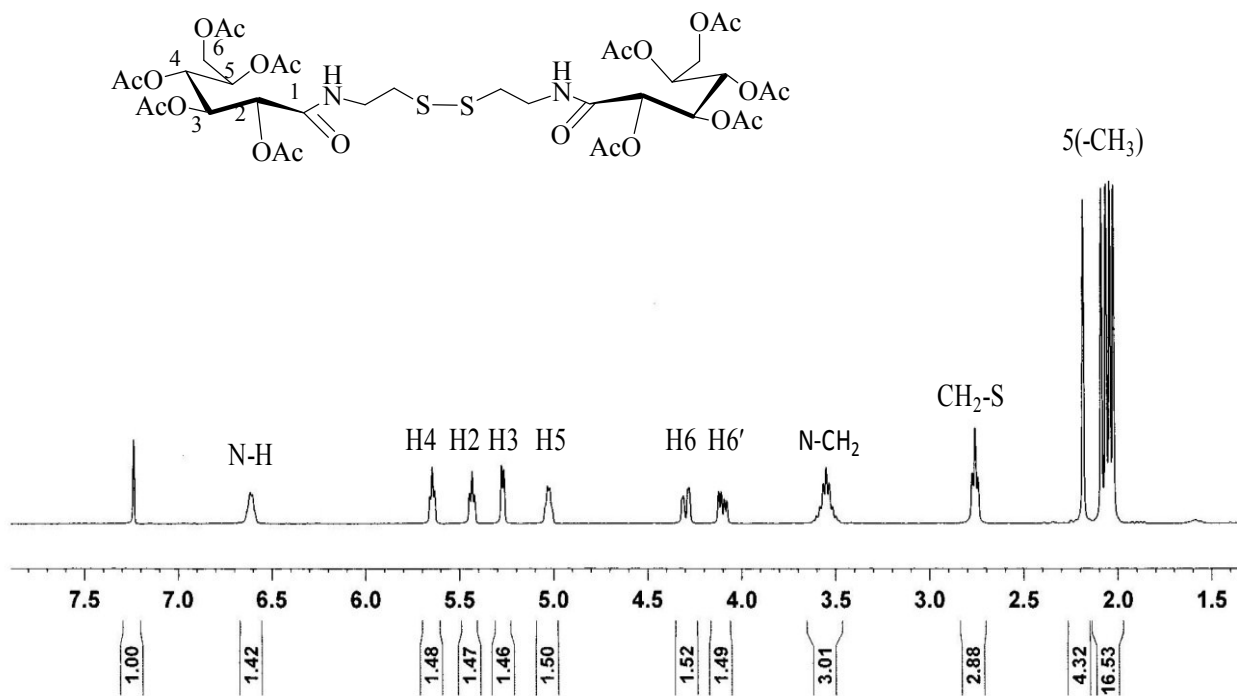

Figure S2.  $^1\text{H}$  NMR spectrum of **L5**

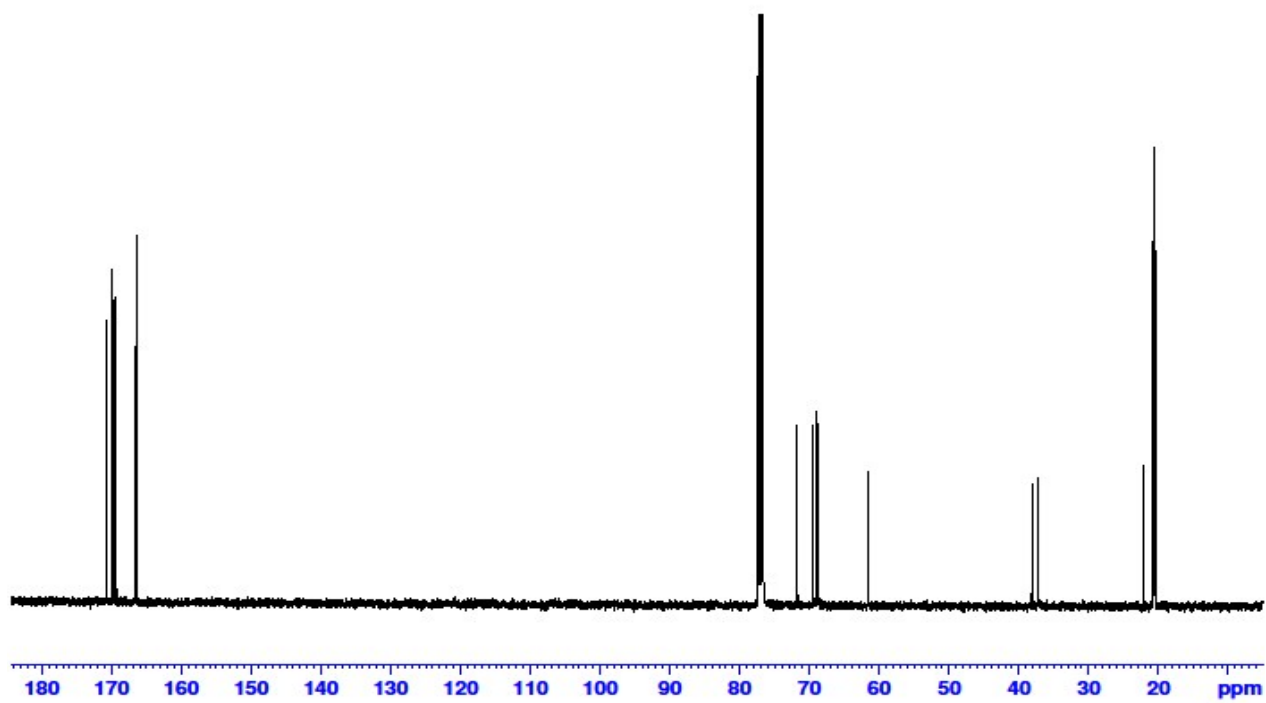

Figure S3.  $^{13}\text{C}$  NMR spectrum of **L5**



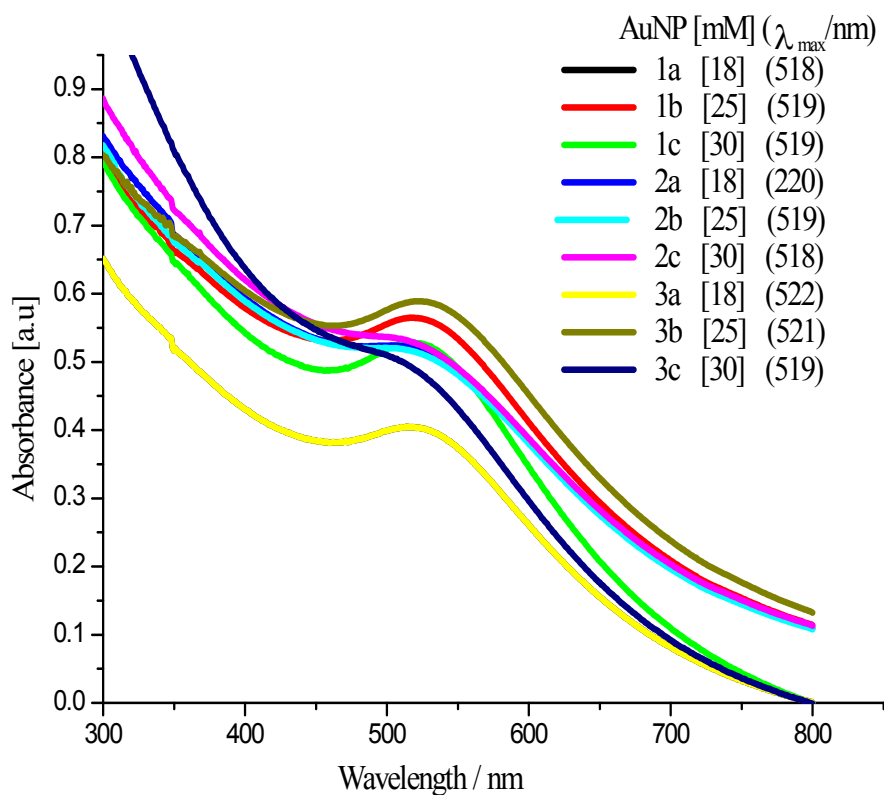

Figure S4. UV-vis spectra of **AuNP 1-3**

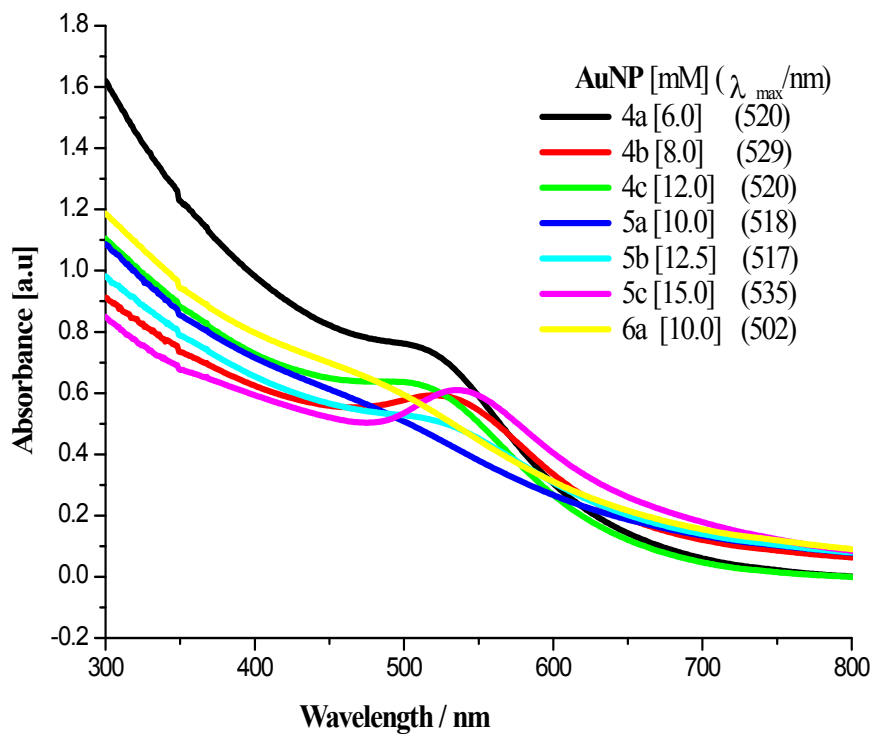

Figure S5. UV-vis spectra of **AuNP 4-6**

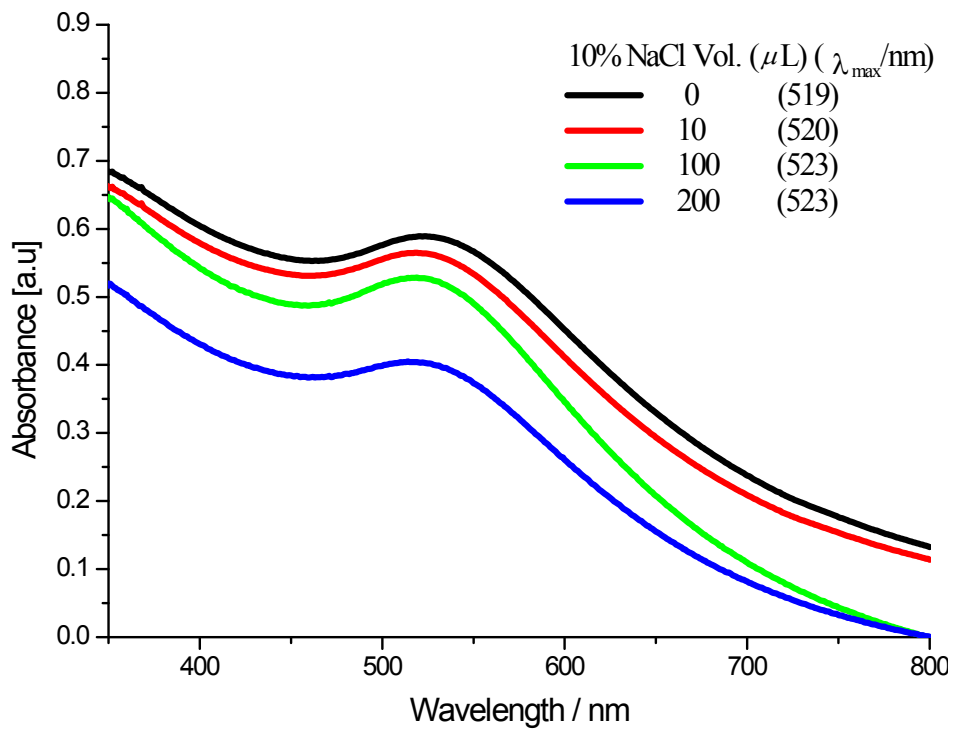

Figure S6. Stability of glyco GNPs assessed by measuring the critical flocculation concentration using 1.7 M NaCl solution.

**Table S1:** Inhibitory concentration 50 (IC<sub>50</sub>) of thiocarbohydrate compounds (**L1-L4**) and **AuNPs 1-3** derivatives in cancer cell lines

| Compounds           | Cell lines / IC <sub>50</sub> (μM) |        |        |
|---------------------|------------------------------------|--------|--------|
|                     | MCF7                               | HCT116 | PC3    |
| <b>Parthenolide</b> | 6.38                               | 16.09  | 18.42  |
| <b>L1-L4</b>        | ≥ 100                              | ≥ 100  | ≥ 100  |
| <b>AuNPs-1a</b>     | 88.61                              | 151.30 | 179.40 |
| <b>AuNPs-2a</b>     | 91.39                              | 216.90 | 136.50 |
| <b>AuNPs-3a</b>     | 126.8                              | 296.50 | 271.50 |

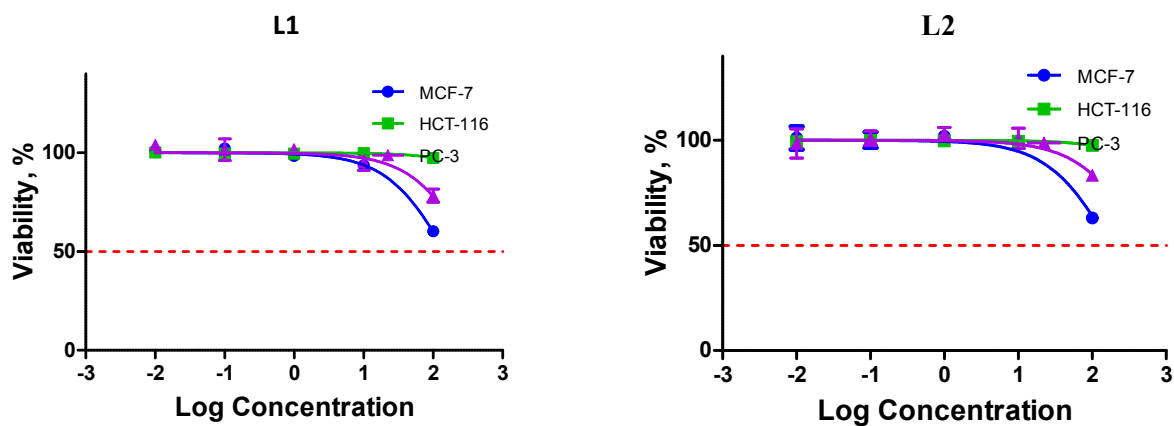

Figure S7. Growth inhibition profile of three human cancer cells of thiocarbohyrate L1 and L2.

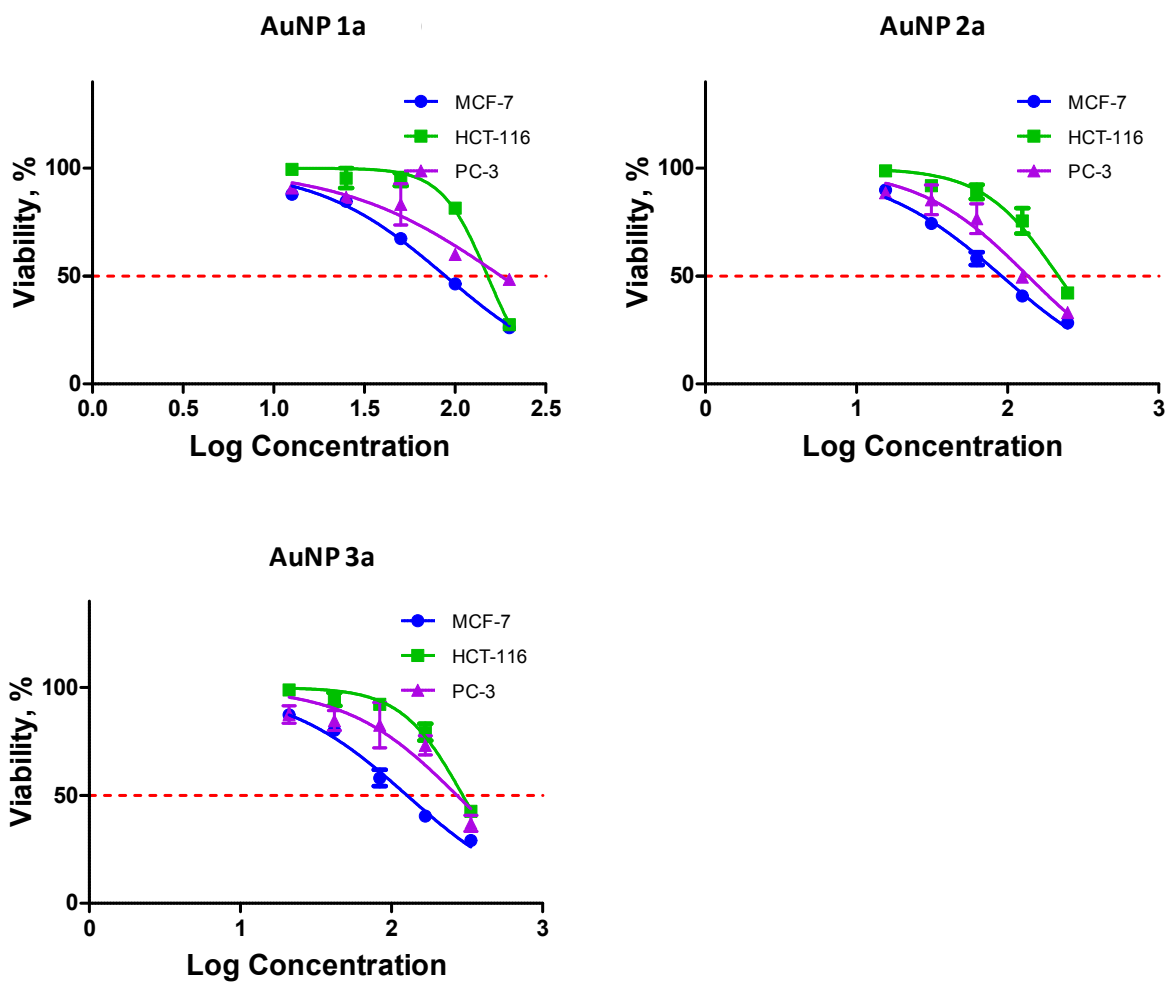

Figure S8. Growth inhibition profile of three human cancer cells of AuNPs **1a**, **2a** and **3a**
